# Supplementary material for: Unraveling the mechanisms of S-doped carbon nitride for photocatalytic oxygen reduction to H2O2
Source: Royal Society of Chemistry journal article supplement (doi:10.1039/d0cp03533e), 2020-01-01
Supplement: d0cp03533e1.pdf [file d0cp03533e1.pdf]

## Supporting Information

### **Unraveling the Mechanisms of S-doped Carbon Nitride for Photocatalytic Oxygen Reduction to H<sub>2</sub>O<sub>2</sub>**

Yawen Tong,<sup>a</sup> Changgeng Wei,<sup>a</sup> Yi Li,<sup>ab</sup> Yongfan Zhang,<sup>ab</sup> Wei Lin<sup>\*ab</sup>

<sup>a</sup> State Key Laboratory of Photocatalysis on Energy and Environment, College of Chemistry,  
Fuzhou University, Fuzhou 350108, P.R. China

<sup>b</sup> Fujian Provincial Key Laboratory of Theoretical and Computational Chemistry, Xiamen,  
Fujian 361005, China

**Table S1.** Zero-point energy ( $E_{\text{ZPE}}$ ) and entropic correction (TS) at  $T = 298.15$  K for relevant species in ORR. The entropy ( $S$ ) of  $\text{H}_2$  is taken from the NIST database. The vibrational frequencies of  $\text{OOH}^*$ ,  $\text{O}^*$  and  $\text{OH}^*$  species are calculated on the most stable adsorption configurations, and they give similar results for  $E_{\text{ZPE}}$ . Thus, constant values of  $E_{\text{ZPE}}$  are used for the oxygenated intermediates adsorbed on various model.

| Species              | $E_{\text{ZPE}}$ (eV) | TS (eV) |
|----------------------|-----------------------|---------|
| $\text{H}_2\text{O}$ | 0.56                  | 0.67    |
| $\text{H}_2$         | 0.28                  | 0.40    |
| $\text{*OOH}$        | 0.47                  | --      |
| $\text{*O}$          | 0.11                  | --      |
| $\text{*OH}$         | 0.40                  | --      |

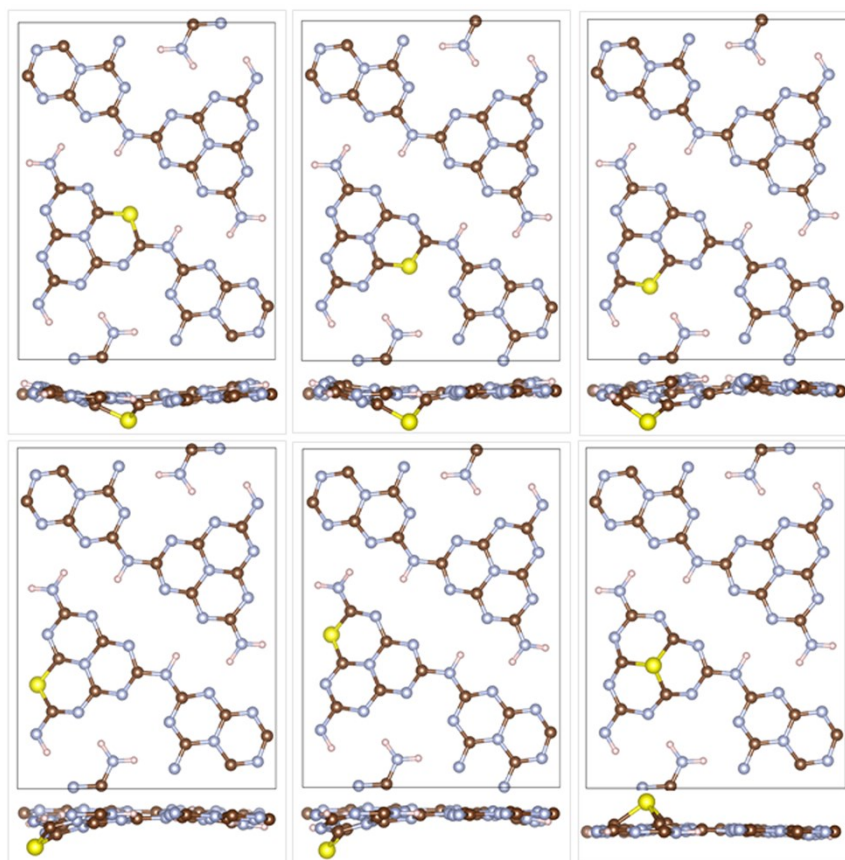

**Figure S1.** Top and side views of geometric structure S-doped melon-based CN of the possible doping sites (N2, N3, N4, N5, N6, N7). The brown, gray, light pink and yellow balls represent C, N, H and S atoms, respectively.

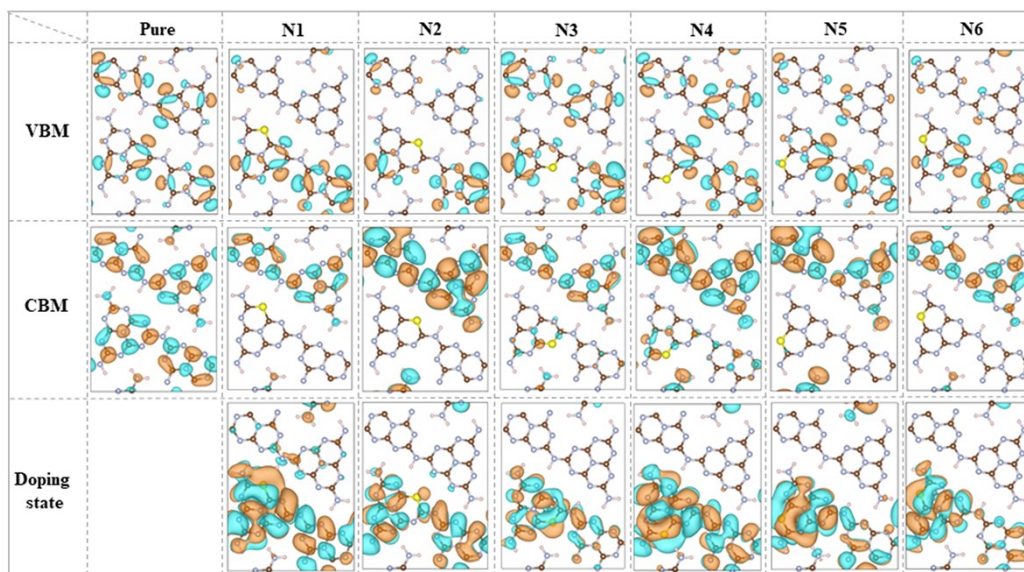

**Figure S2.** The orbital diagrams of VBM, CBM and Doping state of melon-based CN and S-doped melon-based CN. The orbitals with orange and cyan colors represent the positive and negative values of the molecular orbitals (MOs,  $\psi$ ). The brown, gray, light pink and yellow balls represent C, N, H and S atoms, respectively.

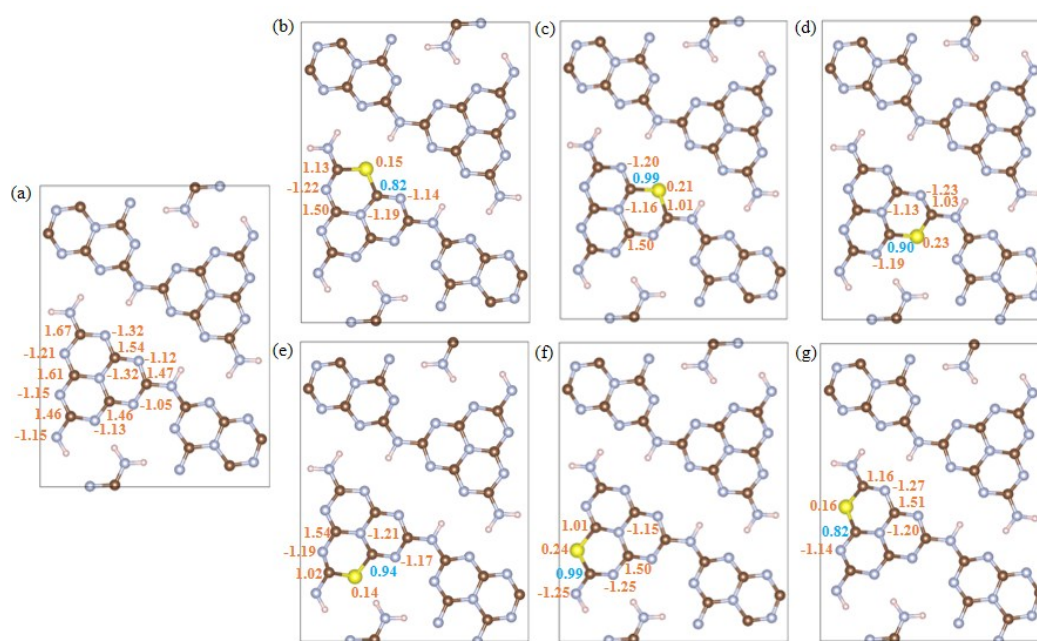

**Figure S3.** Bader charge of (a) melon-based CN, (b) N1, (c) N2, (d) N3, (e) N4, (f) N5 and (g) N6 site S-doped melon-based CN. The brown, gray, light pink and yellow balls represent C, N, H and S atoms, respectively.



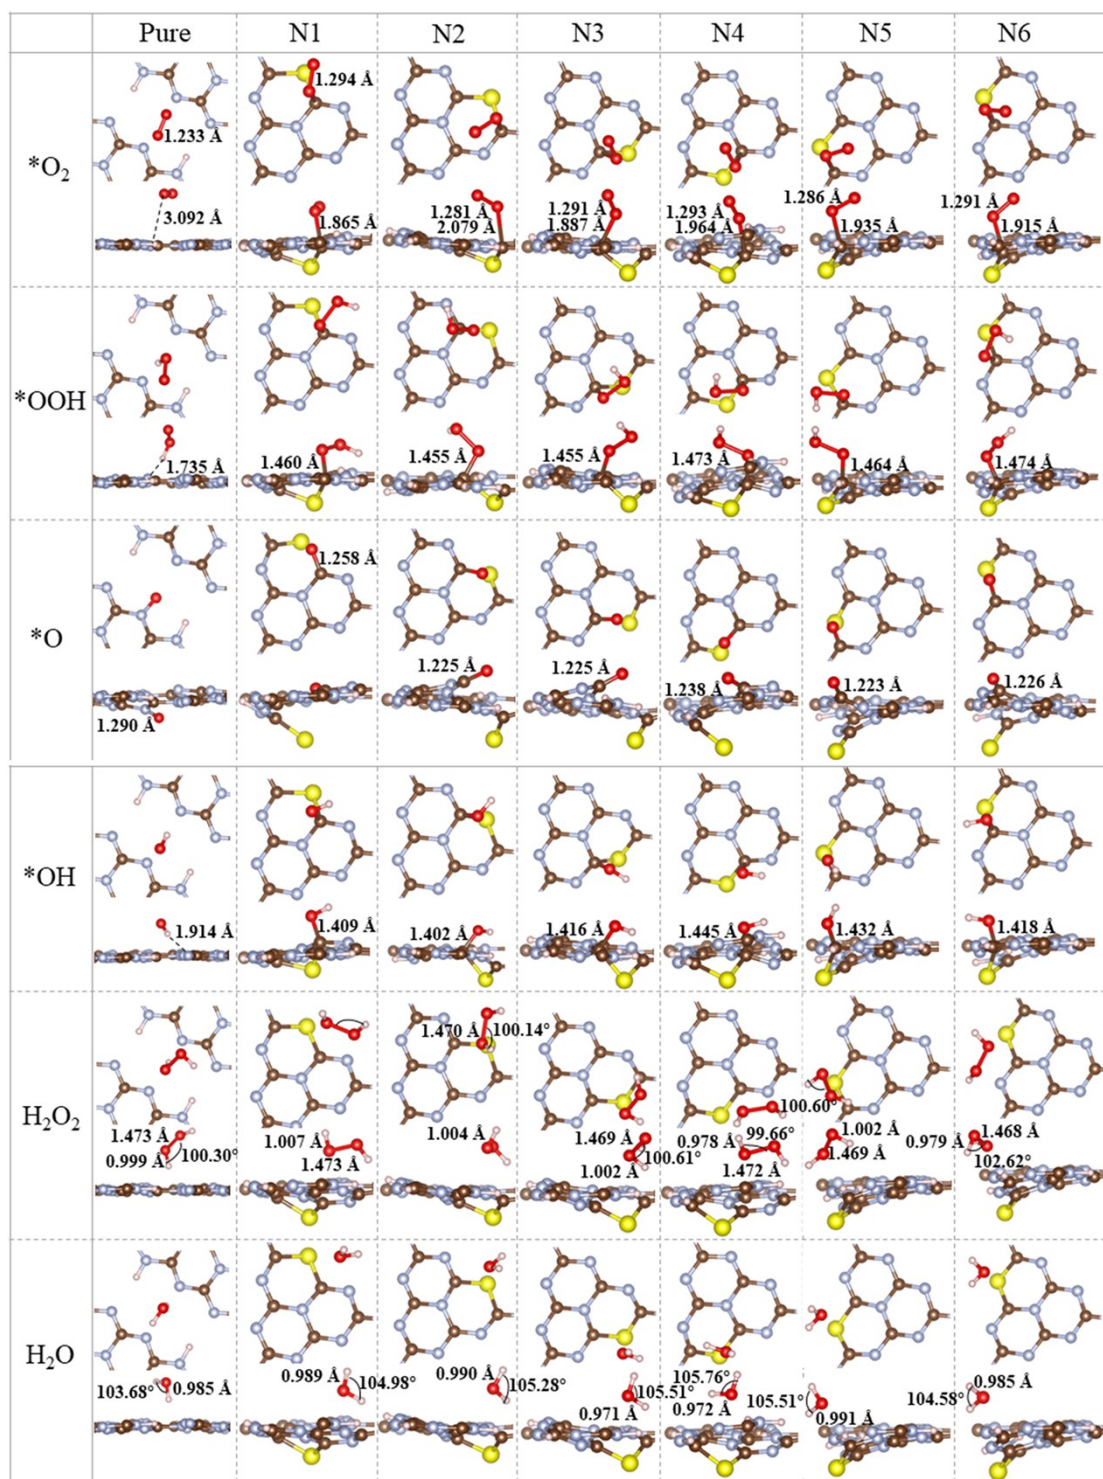

**Figure S4.** The most stable adsorption configurations of relevant species during ORR on melon-based CN and S-doped melon-based CN. The brown, gray, light pink, yellow and red balls represent C, N, H, S and O atoms, respectively.
